# Supplementary material
Source: publisher site journal article supplement (https://www.dovepress.com/article/337284)

## Supplementary Table 1. AB07015 Study Group Investigators listed by country

|                                                                                                                                                                                                                                                                                                                                                                                      |                                                                                                                                                                                                                                                                                                                                                                                                                                                                                                                                                                                                             |                                                                                                                                                                                                                                                                                                                                                                                                                                                                                                                                                                                                                             |
|--------------------------------------------------------------------------------------------------------------------------------------------------------------------------------------------------------------------------------------------------------------------------------------------------------------------------------------------------------------------------------------|-------------------------------------------------------------------------------------------------------------------------------------------------------------------------------------------------------------------------------------------------------------------------------------------------------------------------------------------------------------------------------------------------------------------------------------------------------------------------------------------------------------------------------------------------------------------------------------------------------------|-----------------------------------------------------------------------------------------------------------------------------------------------------------------------------------------------------------------------------------------------------------------------------------------------------------------------------------------------------------------------------------------------------------------------------------------------------------------------------------------------------------------------------------------------------------------------------------------------------------------------------|
| <p><b><u>ALGERIA</u></b></p> <ul style="list-style-type: none"> <li>• Aziza FISSAH (Alger)</li> <li>• Salah LELLOU (Oran)</li> </ul>                                                                                                                                                                                                                                                 | <p><b><u>GREECE</u></b></p> <ul style="list-style-type: none"> <li>• Evangelia GIZOPOULOU (Athens)</li> <li>• Georgios TATSIS (Athens)</li> <li>• Spyros ZAKYNTHINOS (Athens)</li> </ul>                                                                                                                                                                                                                                                                                                                                                                                                                    | <p><b><u>SOUTH AFRICA</u></b></p> <ul style="list-style-type: none"> <li>• Monja-Marie NORTJE (Brandfort)</li> <li>• Richard VAN-ZYL SMIT (Cape Town)</li> </ul>                                                                                                                                                                                                                                                                                                                                                                                                                                                            |
| <p><b><u>ARGENTINA</u></b></p> <ul style="list-style-type: none"> <li>• Ramón ALCHAPAR (Mendoza)</li> <li>• Miguel Angel BERGNA (Buenos Aires)</li> <li>• Pedro Carlos ELIAS (Mendoza)</li> <li>• Marcelo FERNANDEZ (Buenos Aires)</li> <li>• Virginia LARIVEY (Santa Fe)</li> <li>• Andrea MEDINA (Florencio Varela)</li> <li>• Anahi YAÑEZ (Buenos Aires)</li> </ul>               | <p><b><u>HUNGARY</u></b></p> <ul style="list-style-type: none"> <li>• Zsolt PAPAI-SZEKELY (Székesfehérvár)</li> <li>• Mária SZILASI (Debrecen)</li> </ul>                                                                                                                                                                                                                                                                                                                                                                                                                                                   | <p><b><u>SPAIN</u></b></p> <ul style="list-style-type: none"> <li>• Marina BLANCO (A Coruña)</li> <li>• Francisco Javier GONZALEZ BARCALA (Santiago de Compostela)</li> <li>• Xavier MUÑOZ (Barcelona)</li> <li>• Cesar PICADO VALLES (Barcelona)</li> </ul>                                                                                                                                                                                                                                                                                                                                                                |
| <p><b><u>BULGARIA</u></b></p> <ul style="list-style-type: none"> <li>• Krasimir DONCHEV (Gabrova)</li> <li>• Hristo METEV (Ruse)</li> <li>• Rumyanka PENEVA (Sofia)</li> <li>• Vanya TSVETKOVA (Pleven)</li> </ul>                                                                                                                                                                   | <p><b><u>INDIA</u></b></p> <ul style="list-style-type: none"> <li>• Mayank AGRAWAL (Veranasi)</li> <li>• Vasireddy ARUNA (Vijayawada)</li> <li>• Archana BABURAO (Bangalore)</li> <li>• George D'SOUZA (Bangalore)</li> <li>• Vikranth DESHMUKH (Nagpur)</li> <li>• Inderjeeth GODARA (Jaipur)</li> <li>• Manak GUJARANI (Bikaner)</li> <li>• Ashish KUMAR DEB (Varanasi)</li> <li>• Ravindra MORESHWAR SARNAIK (Nagpur)</li> <li>• Balkrishna ONKAR TAYADE (Nagpur)</li> <li>• Ravindra REDDY (Hyderabad)</li> <li>• Mohammed SAMIUDDIN (Hyderabad)</li> <li>• Nageshwar VYAKARNAM (Hanmakonda)</li> </ul> | <p><b><u>TAIWAN</u></b></p> <ul style="list-style-type: none"> <li>• Ming-Shyan HUANG (Kaohsiung City)</li> </ul>                                                                                                                                                                                                                                                                                                                                                                                                                                                                                                           |
| <p><b><u>CZECH REPUBLIC</u></b></p> <ul style="list-style-type: none"> <li>• Jaromír BYSTRON (Olomouc)</li> <li>• Ján DINDOS (Neratovice)</li> <li>• Jaromír MUSIL (Mělník)</li> <li>• Norbert PAUK (Prague)</li> <li>• Vratislav SEDLAK (Hradec Králové)</li> <li>• Jana SKRICKOVA (Brno)</li> </ul>                                                                                | <p><b><u>POLAND</u></b></p> <ul style="list-style-type: none"> <li>• Adam ANTCZAK (Łódź)</li> <li>• Grażyna JASIENIAK-PINIS (Krakow)</li> <li>• Ewa JASSEM (Gdańsk)</li> <li>• Marek KOWALSKI (Łódź)</li> </ul>                                                                                                                                                                                                                                                                                                                                                                                             | <p><b><u>THAILAND</u></b></p> <ul style="list-style-type: none"> <li>• Hiroshi CHANTAPHAKUL (Bangkok)</li> <li>• Kittipong MANEECHOTESUWAN (Bangkok)</li> </ul>                                                                                                                                                                                                                                                                                                                                                                                                                                                             |
| <p><b><u>FRANCE</u></b></p> <ul style="list-style-type: none"> <li>• Frédéric DE BLAY (Strasbourg)</li> <li>• Gilles DEVOUASSOUX (Lyon)</li> <li>• Pierre-Olivier GIRODET (Bordeaux)</li> <li>• François LEBARGY (Reims)</li> <li>• Christophe LEROYER (Brest)</li> <li>• Jean-Philippe OSTER (Colmar)</li> <li>• Alain PROUST (Nîmes)</li> <li>• Benoît WALLAERT (Lille)</li> </ul> | <p><b><u>ROMANIA</u></b></p> <ul style="list-style-type: none"> <li>• Lavinia DAVIDESCU (Oradea)</li> <li>• Manuela Cosmina MAGDAU (Cluj-Napoca)</li> <li>• Dana Cristina OLAR (Arad)</li> <li>• Georgita Gilda POPESCU (Bucharest)</li> <li>• Doina Adina TODEA (Cluj-Napoca)</li> </ul>                                                                                                                                                                                                                                                                                                                   | <p><b><u>TUNISIA</u></b></p> <ul style="list-style-type: none"> <li>• Majed BEJI (Tunis)</li> <li>• Mohamed BENZARTI (Sousse)</li> <li>• Mohamed Ridha CHARFI (La Marsa)</li> <li>• Rezaig CHEIKH (Tunis)</li> <li>• Mohamed Lamine MEGDICHE (Ariana)</li> <li>• Fatma TRITAR (Ariana)</li> </ul>                                                                                                                                                                                                                                                                                                                           |
| <p><b><u>GERMANY</u></b></p> <ul style="list-style-type: none"> <li>• Ludger LINDEMANN (Gelsenkirchen)</li> <li>• Anneliese LINNHOF (Berlin)</li> </ul>                                                                                                                                                                                                                              | <p><b><u>SLOVAKIA</u></b></p> <ul style="list-style-type: none"> <li>• Ivan HLINKA (Kežmarok)</li> <li>• Slavomir HREBENAR (Spišská Nová Ves)</li> </ul>                                                                                                                                                                                                                                                                                                                                                                                                                                                    | <p><b><u>UKRAINE</u></b></p> <ul style="list-style-type: none"> <li>• Volodymyr GAVRYSYUK (Kyiv)</li> <li>• Olga GODLEVSKA (Kharkiv)</li> <li>• Nataliia GOLOVCHENKO (Kherson)</li> <li>• Eduard KHODOSH (Kharkiv)</li> <li>• Oleksii KORZH (Kharkiv)</li> <li>• Yuliia KULITKA (Lviv)</li> <li>• Lesia KURYK (Kyiv)</li> <li>• Tetyana PERTSEVA (Dnipro)</li> <li>• Victoriia RODIONOVA (Dnipro)</li> <li>• Viktor SUSHKO (Kyiv)</li> <li>• Marianna TOVT-KORSHYNSKA (Uzhgorod)</li> <li>• Victoriia TYAGLAYA (Zaporizhzhya)</li> <li>• Grigoriy URSOL (Kropyvnytskyi)</li> <li>• Ivan VYSHNYVETSKYY (Zhytomyr)</li> </ul> |

**Supplementary Table 2. Summary of treatment exposure in patients that received at least one dose of study medication**

|                                              | <b>Masitinib (N=271)</b> | <b>Placebo (N=133)</b> |
|----------------------------------------------|--------------------------|------------------------|
| <b>Completed initial week-36 period</b>      | 56.8% (154)              | 63.2% (84)             |
| <b>Entered blinded extension period</b>      | 48.0% (130)              | 52.6% (70)             |
| <b>Treated until database lock</b>           | 31.0% (84)               | 32.3% (43)             |
| <b>Duration of overall exposure (months)</b> |                          |                        |
| Mean ± SD                                    | 13.2 ± 12.01             | 13.1 ± 9.70            |
| Median                                       | 8.8                      | 9.4                    |
| Range                                        | 0 – 81                   | 0 – 49                 |

**Supplementary Table 3. Sensitivity analysis of severe asthma exacerbation rates with cohorts according to annualized cumulative oral corticosteroid (prednisone-equivalent) intake**

| Cohort                                                                    | Treatment (n)   | Exposure (months) | SAER | Rate ratio [95%CI] | Reduction <sup>a</sup> | P-value |
|---------------------------------------------------------------------------|-----------------|-------------------|------|--------------------|------------------------|---------|
| <i>Primary population</i>                                                 |                 |                   |      |                    |                        |         |
| >500 mg/year                                                              | Masitinib (161) | 13.8              | 0.34 | 0.59 [0.39, 0.88]  | 41%                    | 0.009   |
|                                                                           | Placebo (82)    | 14.4              | 0.55 |                    |                        |         |
| >1000 mg/year                                                             | Masitinib (120) | 13.9              | 0.26 | 0.49 [0.29, 0.82]  | 51%                    | 0.006   |
|                                                                           | Placebo (66)    | 15.2              | 0.53 |                    |                        |         |
| >1500 mg/year                                                             | Masitinib (89)  | 14.5              | 0.19 | 0.43 [0.21, 0.88]  | 57%                    | 0.020   |
|                                                                           | Placebo (52)    | 15.2              | 0.42 |                    |                        |         |
| <i>Eosinophil (<math>\geq 150</math> cell/<math>\mu</math>L) subgroup</i> |                 |                   |      |                    |                        |         |
| >500 mg/year                                                              | Masitinib (127) | 13.4              | 0.32 | 0.51 [0.39, 0.88]  | 49%                    | 0.005   |
|                                                                           | Placebo (60)    | 13.9              | 0.60 |                    |                        |         |
| >1000 mg/year                                                             | Masitinib (92)  | 13.3              | 0.22 | 0.29 [0.29, 0.82]  | 71%                    | <0.001  |
|                                                                           | Placebo (46)    | 15.2              | 0.55 |                    |                        |         |
| >1500 mg/year                                                             | Masitinib (69)  | 13.9              | 0.15 | 0.28 [0.21, 0.88]  | 72%                    | 0.003   |
|                                                                           | Placebo (38)    | 15.5              | 0.49 |                    |                        |         |

n: number of patients in analysis. SAER: Severe asthma exacerbation rate (annualized rate adjusted for the overall time on treatment). CI: confidence interval. <sup>a</sup>

Reduction in the severe asthma exacerbation rate relative to placebo.

**Supplementary Table 4. Sensitivity analysis of annualized severe asthma exacerbation rates, wherein severe exacerbations are defined as an increase in stable maintenance OCS dose of at least 40 mg/day (prednisone-equivalent) for at least 3 days**

| Cohort                                                                    | Treatment (n)   | Exposure (years) | Annualized rate (events/year) | Rate ratio [95%CI] | Reduction <sup>a</sup> | P-value |
|---------------------------------------------------------------------------|-----------------|------------------|-------------------------------|--------------------|------------------------|---------|
| <i>Primary population</i>                                                 |                 |                  |                               |                    |                        |         |
| Overall treatment                                                         | Masitinib (240) | 1.14             | 0.22                          | 0.46 [0.31, 0.68]  | 54%                    | 0.0001  |
|                                                                           | Placebo (115)   | 1.15             | 0.4                           |                    |                        |         |
| Week 36                                                                   | Masitinib       | 0.54             | 0.32                          | 0.61 [0.38, 0.96]  | 39%                    | 0.0332  |
|                                                                           | Placebo         | 0.60             | 0.5                           |                    |                        |         |
| Week 48                                                                   | Masitinib       | 0.65             | 0.29                          | 0.52 [0.34, 0.81]  | 48%                    | 0.0033  |
|                                                                           | Placebo         | 0.72             | 0.55                          |                    |                        |         |
| Week 52                                                                   | Masitinib       | 0.69             | 0.28                          | 0.53 [0.34, 0.81]  | 47%                    | 0.0036  |
|                                                                           | Placebo         | 0.76             | 0.53                          |                    |                        |         |
| Week 72                                                                   | Masitinib       | 0.84             | 0.25                          | 0.50 [0.33, 0.77]  | 50%                    | 0.0013  |
|                                                                           | Placebo         | 0.91             | 0.47                          |                    |                        |         |
| Week 96                                                                   | Masitinib       | 0.97             | 0.23                          | 0.51 [0.34, 0.78]  | 49%                    | 0.0015  |
|                                                                           | Placebo         | 1.02             | 0.42                          |                    |                        |         |
| <i>Eosinophil (<math>\geq 150</math> cell/<math>\mu</math>L) subgroup</i> |                 |                  |                               |                    |                        |         |
| Overall treatment                                                         | Masitinib (181) | 1.1              | 0.23                          | 0.52 [0.32, 0.82]  | 48%                    | 0.0055  |
|                                                                           | Placebo (87)    | 1.12             | 0.41                          |                    |                        |         |
| Week 36                                                                   | Masitinib       | 0.54             | 0.31                          | 0.56 [0.32, 0.97]  | 44%                    | 0.0399  |
|                                                                           | Placebo         | 0.6              | 0.59                          |                    |                        |         |
| Week 48                                                                   | Masitinib       | 0.65             | 0.27                          | 0.47 [0.28, 0.79]  | 53%                    | 0.0043  |
|                                                                           | Placebo         | 0.73             | 0.57                          |                    |                        |         |
| Week 52                                                                   | Masitinib       | 0.69             | 0.26                          | 0.48 [0.29, 0.81]  | 52%                    | 0.0053  |
|                                                                           | Placebo         | 0.76             | 0.54                          |                    |                        |         |
| Week 72                                                                   | Masitinib       | 0.84             | 0.24                          | 0.52 [0.31, 0.85]  | 48%                    | 0.0097  |
|                                                                           | Placebo         | 0.9              | 0.46                          |                    |                        |         |
| Week 96                                                                   | Masitinib       | 0.97             | 0.23                          | 0.53 [0.33, 0.87]  | 47%                    | 0.0123  |
|                                                                           | Placebo         | 1.0              | 0.41                          |                    |                        |         |
| <i>Full Analysis Dataset (FAS)</i>                                        |                 |                  |                               |                    |                        |         |
| Overall treatment                                                         | Masitinib (269) | 1.1              | 0.22                          | 0.47 [0.32, 0.68]  | 53%                    | <0.001  |
|                                                                           | Placebo (133)   | 1.09             | 0.38                          |                    |                        |         |
| Week 36                                                                   | Masitinib       | 0.54             | 0.32                          | 0.60 [0.38, 0.93]  | 40%                    | 0.0229  |
|                                                                           | Placebo         | 0.6              | 0.5                           |                    |                        |         |
| Week 48                                                                   | Masitinib       | 0.65             | 0.29                          | 0.53 [0.35, 0.81]  | 47%                    | 0.0030  |
|                                                                           | Placebo         | 0.72             | 0.5                           |                    |                        |         |
| Week 52                                                                   | Masitinib       | 0.68             | 0.28                          | 0.53 [0.35, 0.81]  | 47%                    | 0.0032  |
|                                                                           | Placebo         | 0.75             | 0.48                          |                    |                        |         |
| Week 72                                                                   | Masitinib       | 0.82             | 0.25                          | 0.52 [0.35, 0.78]  | 48%                    | 0.0017  |
|                                                                           | Placebo         | 0.88             | 0.43                          |                    |                        |         |
| Week 96                                                                   | Masitinib       | 0.94             | 0.23                          | 0.53 [0.36, 0.79]  | 47%                    | 0.0017  |
|                                                                           | Placebo         | 0.98             | 0.39                          |                    |                        |         |

n: number of patients in analysis. CI: confidence interval. <sup>a</sup> Reduction in the severe asthma exacerbation rate relative to placebo. Overall treatment: annualized rate adjusted for the overall time on treatment. OCS: oral corticosteroids.

**Supplementary Table 5. Secondary endpoint analysis of moderate/severe asthma exacerbation rate (annualized rate adjusted for the overall time on treatment)**

| <b>Treatment (n)</b>                                                      | <b>Exposure (months)</b> | <b>Annualized rate (events/year)</b> | <b>Rate ratio [95%CI]</b> | <b>Reduction <sup>a</sup></b> | <b>P-value</b> |
|---------------------------------------------------------------------------|--------------------------|--------------------------------------|---------------------------|-------------------------------|----------------|
| <i>Primary analysis population</i>                                        |                          |                                      |                           |                               |                |
| Masitinib (240)                                                           | 13.7                     | 0.48                                 | 0.64 [0.48, 0.84]         | 36%                           | 0.001          |
| Placebo (115)                                                             | 13.8                     | 0.69                                 |                           |                               |                |
| <i>Eosinophil (<math>\geq 150</math> cell/<math>\mu</math>L) subgroup</i> |                          |                                      |                           |                               |                |
| Masitinib (181)                                                           | 13.2                     | 0.48                                 | 0.69 [0.49, 0.95]         | 31%                           | 0.025          |
| Placebo (87)                                                              | 13.4                     | 0.71                                 |                           |                               |                |

n: number of patients in analysis. CI: confidence interval. <sup>a</sup>Reduction in the overall asthma exacerbation rate relative to placebo.

**Supplementary Table 6. Most common adverse events for masitinib treatment relative to placebo over the study period (AEs listed had incidence  $\geq 3\%$  in ITT population and relative risk  $>1.0$ )**

| <b>Number (%) of pts with at least 1 event</b> | <b>Masitinib<br/>(N = 271)</b> | <b>Placebo<br/>(N = 133)</b> | <b>Relative risk<br/>[95%CI]</b> |
|------------------------------------------------|--------------------------------|------------------------------|----------------------------------|
| <b>Clinical AE</b>                             |                                |                              |                                  |
| Vomiting                                       | 16 (5.9)                       | 1 (0.8)                      | 7.9 [1.05, 58.6]                 |
| Diarrhea                                       | 25 (9.2)                       | 3 (2.3)                      | 4.1 [1.26, 13.3]                 |
| Rash maculo-papular                            | 11 (4.1)                       | 2 (1.5)                      | 2.7 [0.61, 12.0]                 |
| Abdominal pain upper                           | 11 (4.1)                       | 2 (1.5)                      | 2.7 [0.61, 12.0]                 |
| Nausea                                         | 25 (9.2)                       | 6 (4.5)                      | 2.0 [0.86, 4.86]                 |
| Weight decreased                               | 29 (10.7)                      | 8 (6.0)                      | 1.8 [0.84, 3.78]                 |
| <b>Laboratory-related AE</b>                   |                                |                              |                                  |
| Blood calcium decreased                        | 15 (5.5)                       | 1 (0.8)                      | 7.4 [0.98, 55.1]                 |
| Hemoglobin decreased                           | 20 (7.4)                       | 4 (3.0)                      | 2.5 [0.86, 7.04]                 |
| Aspartate aminotransferase increased           | 33 (12.2)                      | 7 (5.3)                      | 2.3 [1.05, 5.09]                 |
| Blood phosphorus decreased                     | 35 (12.9)                      | 9 (6.8)                      | 1.9 [0.95, 3.85]                 |
| White blood cell count decreased               | 11 (4.1)                       | 3 (2.3)                      | 1.8 [0.51, 6.34]                 |
| Blood creatinine increased                     | 10 (3.7)                       | 3 (2.3)                      | 1.6 [0.46, 5.85]                 |
| Alanine aminotransferase increased             | 22 (8.1)                       | 7 (5.3)                      | 1.5 [0.68, 3.52]                 |
| Blood lactate dehydrogenase increased          | 21 (7.7)                       | 7 (5.3)                      | 1.5 [0.64, 3.38]                 |
| Hematocrit decreased                           | 9 (3.3)                        | 3 (2.3)                      | 1.5 [0.41, 5.35]                 |
| Hypoalbuminemia                                | 9 (3.3)                        | 3 (2.3)                      | 1.5 [0.41, 5.35]                 |
| Blood urea increased                           | 13 (4.8)                       | 5 (3.8)                      | 1.3 [0.46, 3.50]                 |
| Gamma-glutamyl transferase increased           | 32 (11.8)                      | 13 (9.8)                     | 1.2 [0.66, 2.22]                 |
| Lymphocyte count decreased                     | 20 (7.4)                       | 8 (6.0)                      | 1.2 [0.56, 2.71]                 |
| Blood cholesterol increased                    | 19 (7.0)                       | 8 (6.0)                      | 1.2 [0.52, 2.59]                 |
| Blood albumin increased                        | 11 (4.1)                       | 5 (3.8)                      | 1.1 [0.38, 3.04]                 |
| Red blood cell count decreased                 | 14 (5.2)                       | 0 (0.0)                      | NA                               |

Any given AE can be listed under multiple MedDRA preferred terms. AEs were recorded until 28 days after treatment interruption. N/A: Not applicable

**Supplementary Figure 1. Time-series plot of average relative change in peripheral blood eosinophil count from baseline (eosinophil  $\geq 150$  cell/ $\mu$ l subgroup) over 36 weeks (measured weekly over first 8 weeks, then every 4 weeks thereafter). Masitinib treatment did not affect eosinophil count in patients with eosinophilic asthma.**

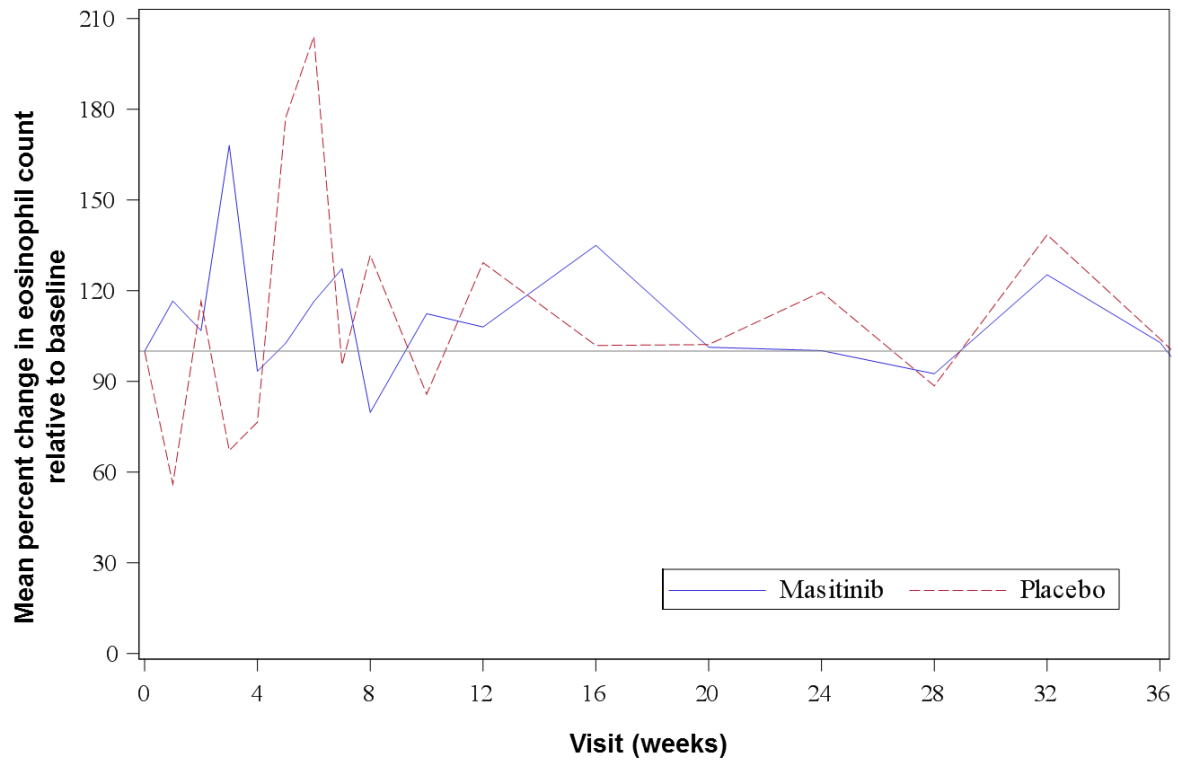

Supplement: Supplementary file 1 [file get_supplementary_file.php]
